# Supplementary material
Source: PubMed Central journal article supplement (PMC8971652)
Supplement: deac015_supplementary_figure_s1.pdf [file deac015_supplementary_figure_s1.pdf]

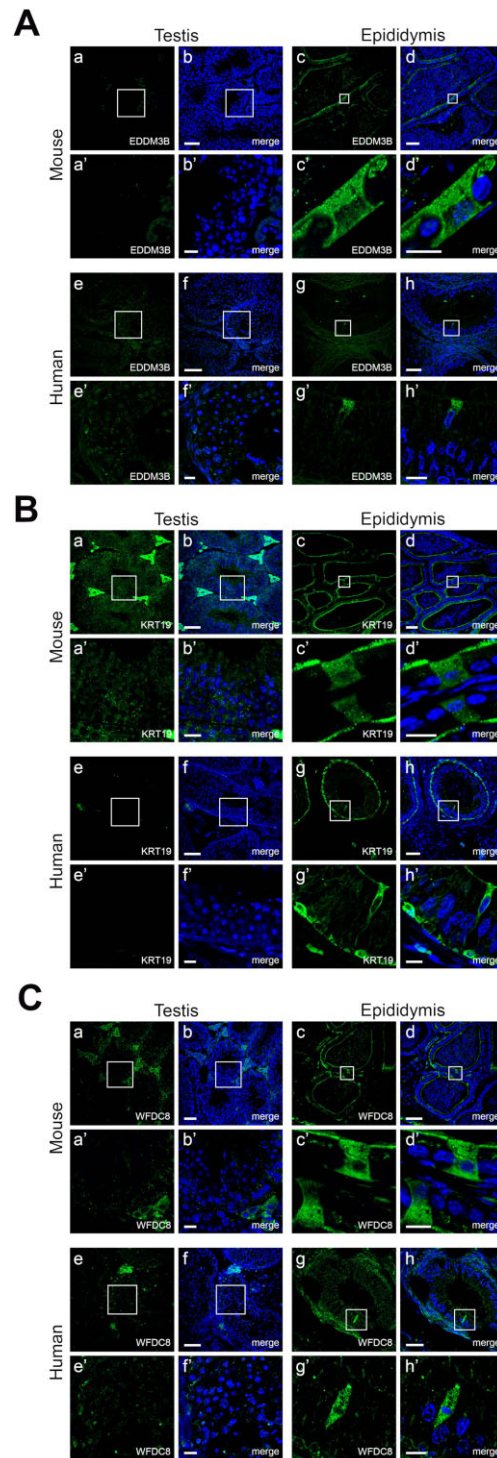

Supplementary Figure S1

**Supplementary Figure S1. Localization of the epididymis-derived proteins EDDM3B, KRT19 and WFDC8 in mouse and human testes and epididymides.** Confocal microscopy images showing the absence of EDDM3B (A), KRT19 (B) and WFDC8 (C) proteins in germ cells from seminiferous tubules of mouse and human testes, and their presence (green) in mouse and human epididymal epithelial cells. Note that although immunofluorescence signal is detected in the connective tissue surrounding the seminiferous tubules (Leydig or Interstitial cells) for KRT19 (B) and WFDC8 (C) proteins, no signal is detected in testicular germ cells. Nuclei are labeled with DAPI in blue. The bottom panels (') show a higher magnification representation of the areas delineated by the boxes in the upper panels. Bars = 50  $\mu$ m for upper panels, Bars = 10  $\mu$ m for lower panels ('). DAPI, 4',6-diamidino-2-phenylindole.
