# Supplementary material
Source: PubMed Central journal article supplement (PMC8971652)
Supplement: deac015_supplementary_figure_s2.pdf [file deac015_supplementary_figure_s2.pdf]

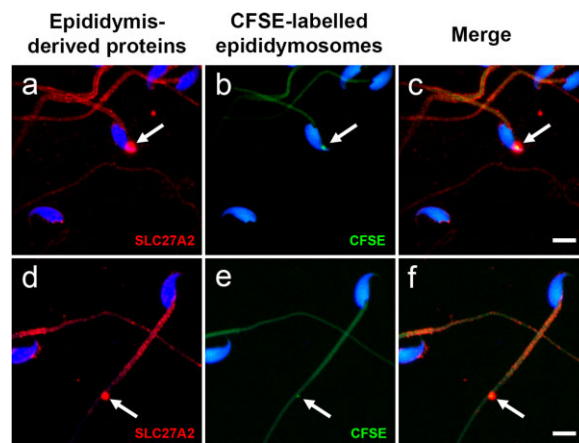

Supplementary Figure S2

**Supplementary Figure S2. Confocal microscopy images of mouse CFSE-labeled epididymosomes containing the epididymis-derived protein SLC27A2 after an *in vitro* incubation with cauda sperm.** Representative images of the localization of the protein SLC27A2 (red; a, d) in CFSE-labeled mouse epididymosomes (green; b, e) attached to mouse cauda sperm, displaying the same laser intensity used for the localization of SLC27A2 in mouse sperm (Fig. 5a and b). Note that although the highest expression of SLC27A2 is found in epididymosomes, SLC27A2 protein is also detected in mouse sperm (a–c, d–f). Sperm nuclei are labeled with DAPI in blue. Confocal microscopy images are presented as maximum intensity projections. Bars = 5 µm. High protein expression of EDDM3B, KRT19 and WFDC8 was also found in mouse epididymosomes, and these proteins were also detected in mouse sperm, as shown in Fig. 5. DAPI, 4',6-diamidino-2-phenylindole.
